# Supplementary material
Source: PubMed Central journal article supplement (PMC5603300)

# Figure S1

A

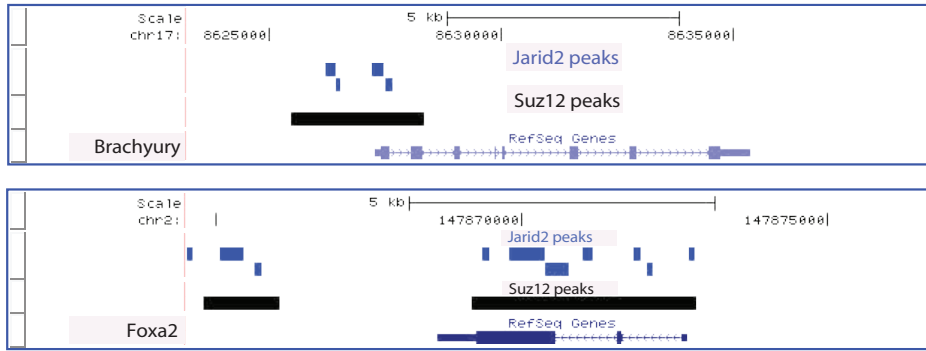

B

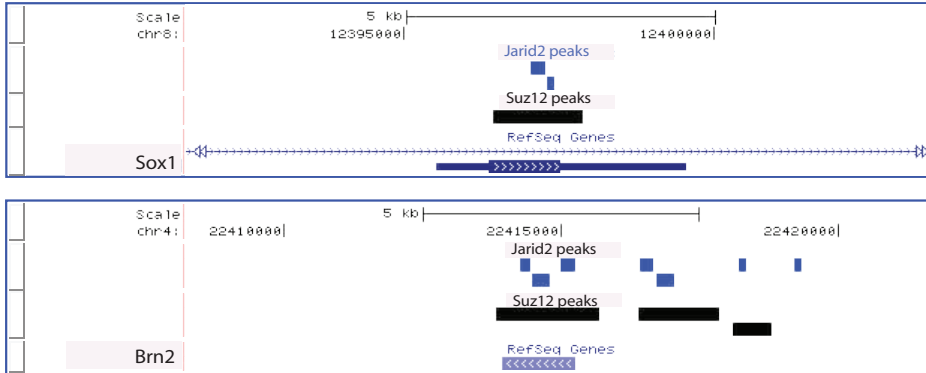

C

| Gene   | ES      | ME     | NE     | ES/ME    | ES/NE    | DistDiag | p-value  |
|--------|---------|--------|--------|----------|----------|----------|----------|
| Klf5   | 1894.3  | 1707.9 | 197.85 | 1.10914  | 9.574425 | 5.985696 | 8.53E-08 |
| Tbx3   | 713.2   | 1100   | 104.65 | 0.648364 | 6.815098 | 4.36042  | 0.02047  |
| Klf9   | 1036.9  | 838    | 205.95 | 1.237351 | 5.034717 | 2.685286 | 0.000313 |
| Oct4   | 3853.3  | 1462.7 | 728.3  | 2.634375 | 5.290814 | 1.886674 | 6.62E-06 |
| Nanog  | 1615.75 | 874.5  | 457.4  | 1.847627 | 3.532466 | 1.198371 | 9.32E-58 |
| Sox2   | 3527.5  | 664.35 | 3496.4 | 5.309701 | 1.008895 | 1.152796 | 1.91E-78 |
| Dnmt3a | 1728.35 | 349.55 | 851.25 | 4.9445   | 2.030367 | 1.060754 | 1.45E-24 |
| Zfp532 | 1308.2  | 309.35 | 956.1  | 4.228867 | 1.368267 | 0.93034  | 6.24E-37 |
| Foxp1  | 859.65  | 207.35 | 799.75 | 4.145889 | 1.074898 | 0.910024 | 1.64E-10 |
| Rbpj   | 1102.9  | 280.8  | 776.85 | 3.927707 | 1.419708 | 0.858864 | 4.94E-07 |

D

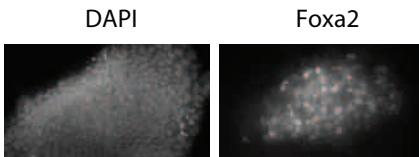

E

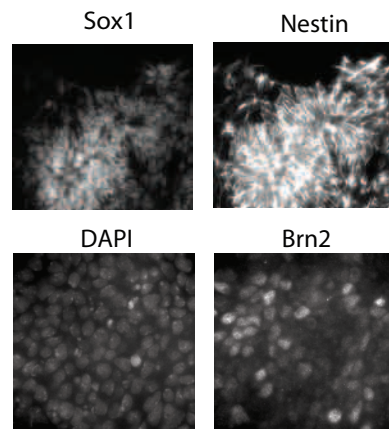

F

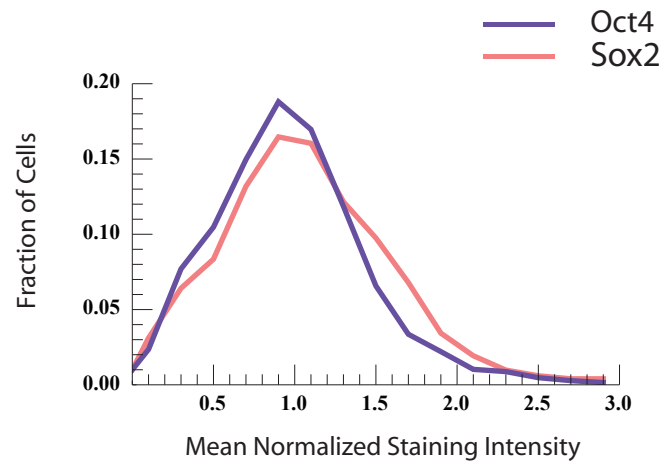

Supplement: NIHMS800882-supplement-1.pdf [file NIHMS800882-supplement-1.pdf]
