# Supplementary material
Source: PubMed Central journal article supplement (PMC5603300)

# Figure S2

A

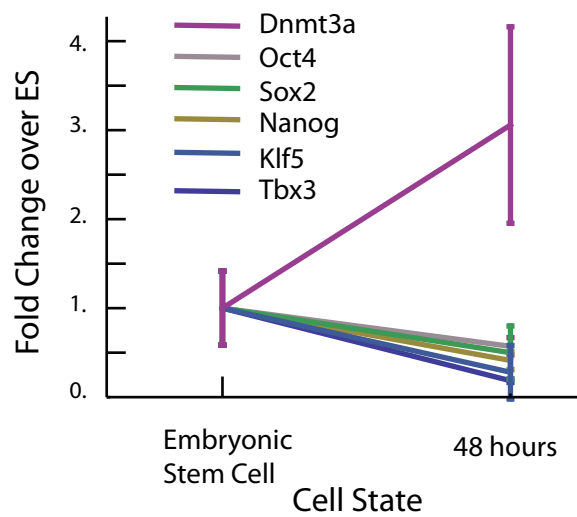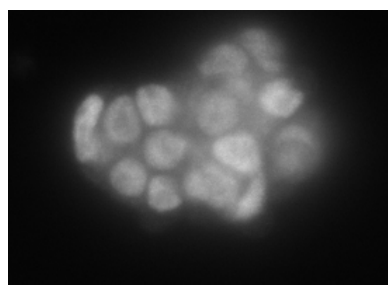

Klf4 ES Cells

B

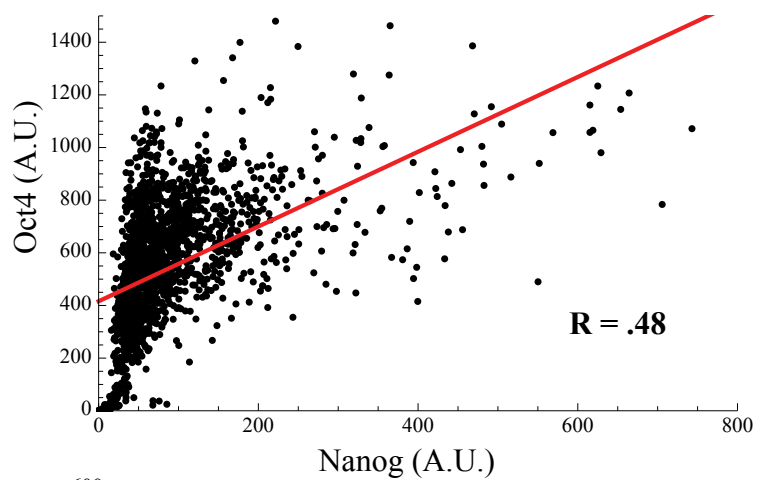

C

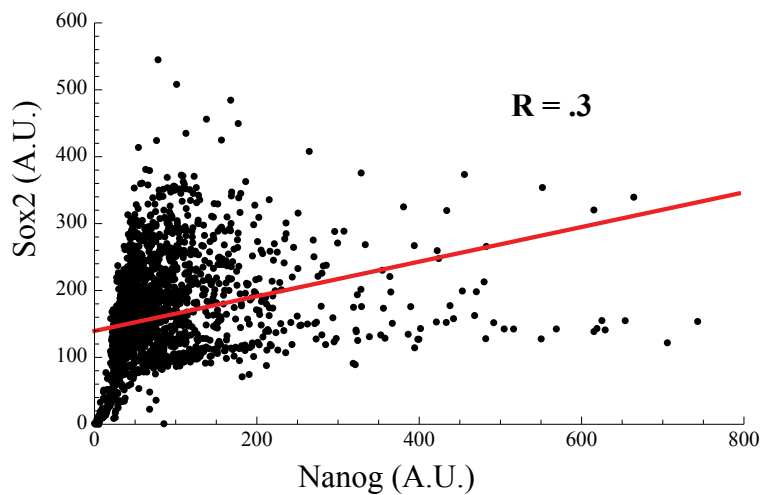

D

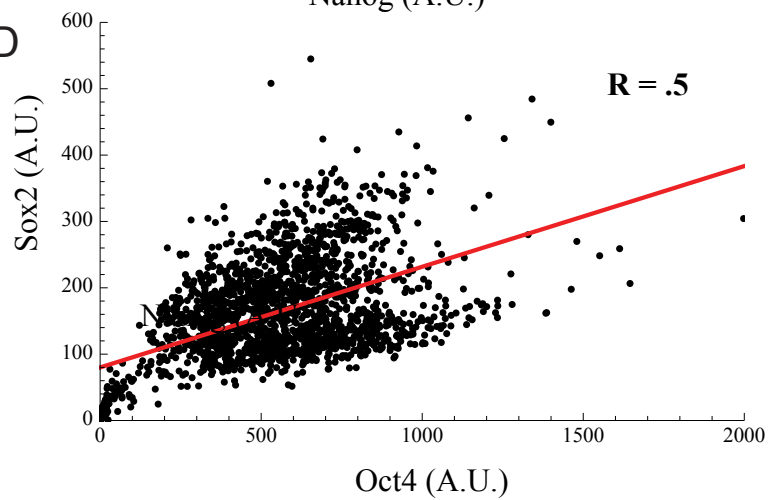

E

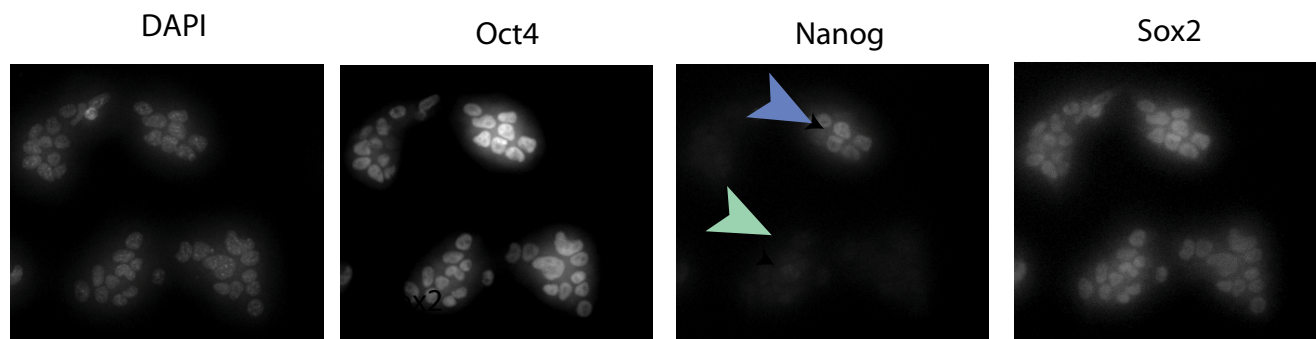

Supplement: NIHMS800882-supplement-2.pdf [file NIHMS800882-supplement-2.pdf]

# Figure S3

A

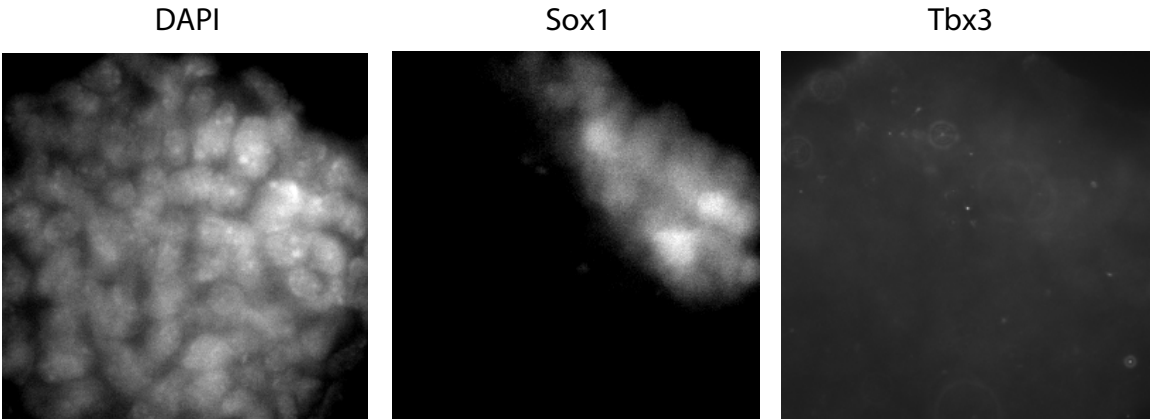

B

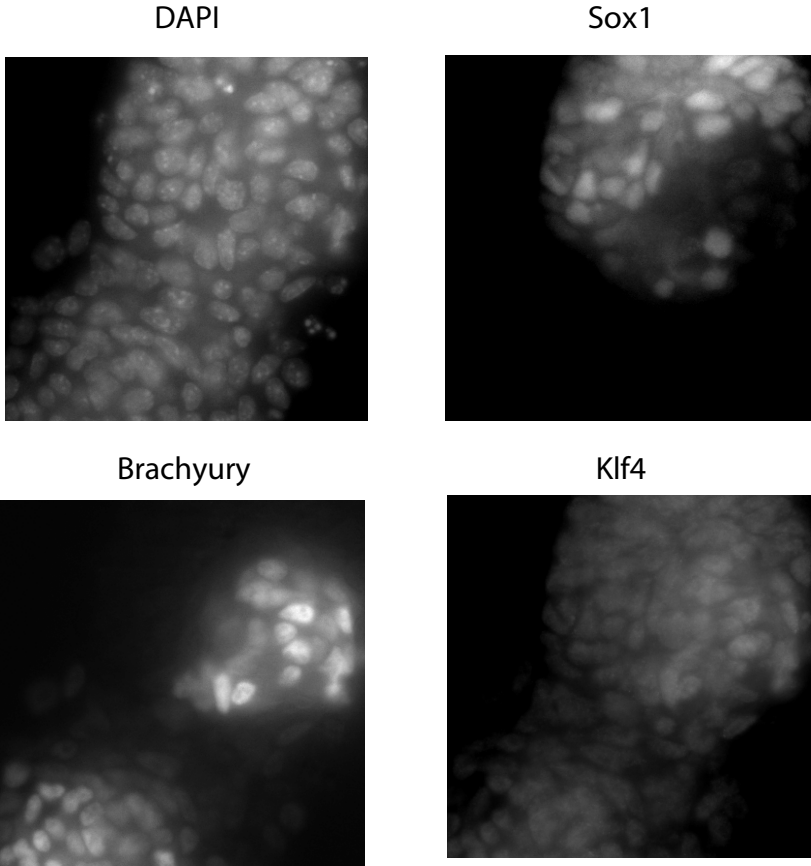

Supplement: NIHMS800882-supplement-3.pdf [file NIHMS800882-supplement-3.pdf]

# Figure S4

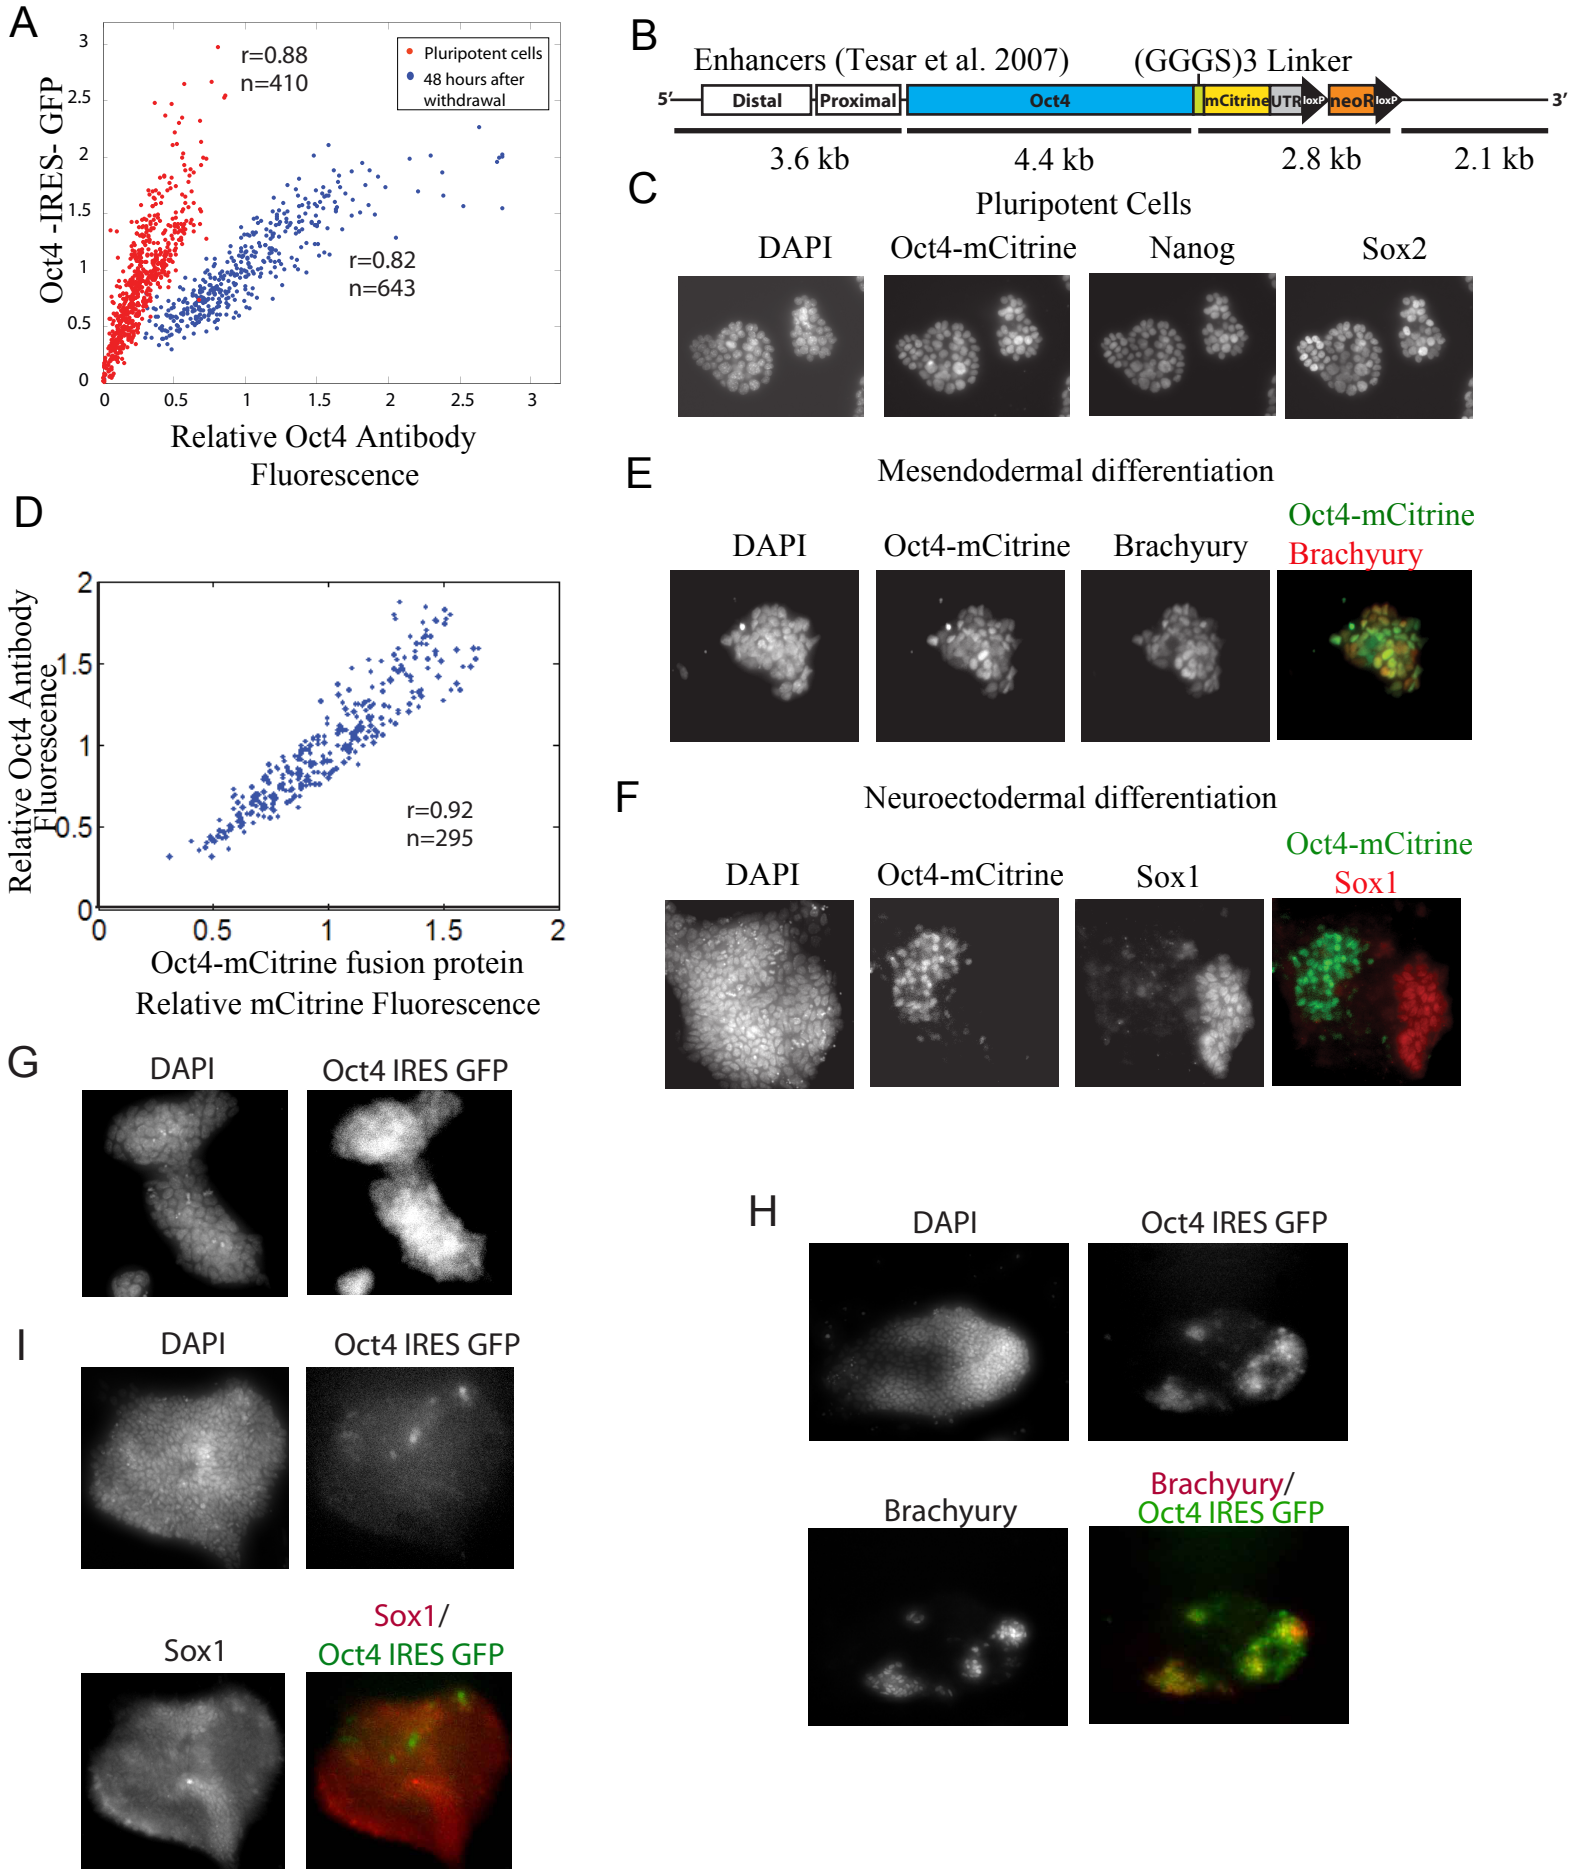

Supplement: NIHMS800882-supplement-4.pdf [file NIHMS800882-supplement-4.pdf]

# Figure S5

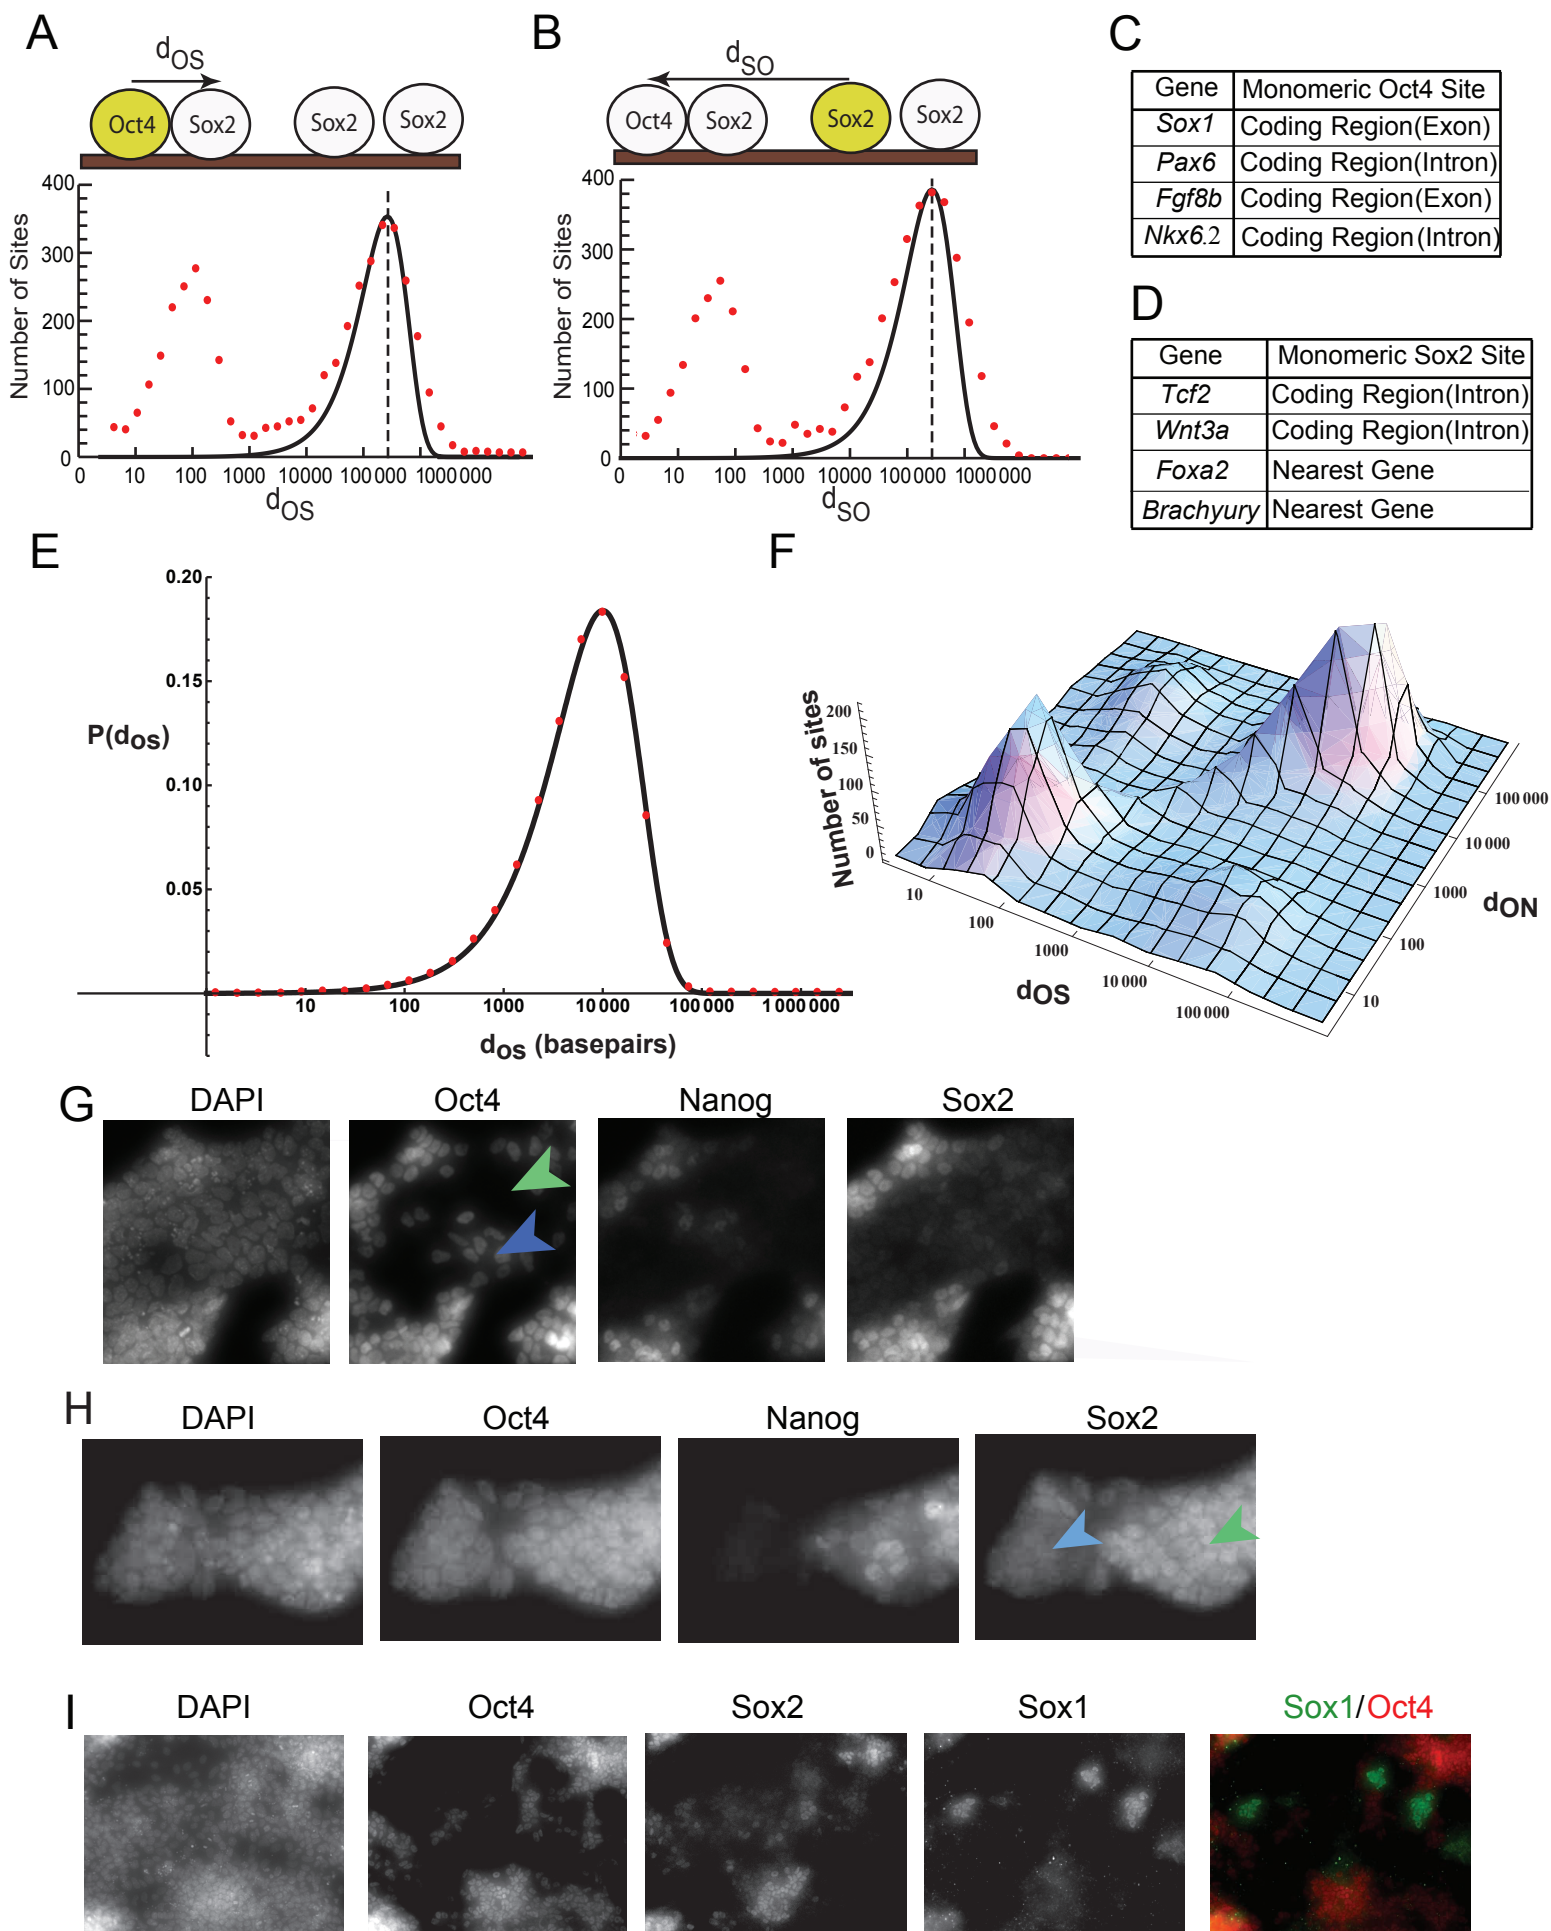

Supplement: NIHMS800882-supplement-5.pdf [file NIHMS800882-supplement-5.pdf]

# Figure S6

A

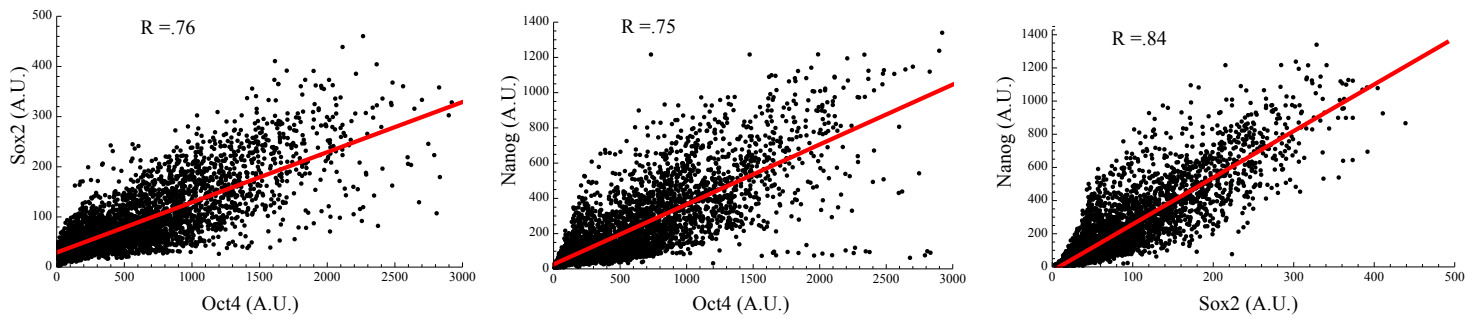

B

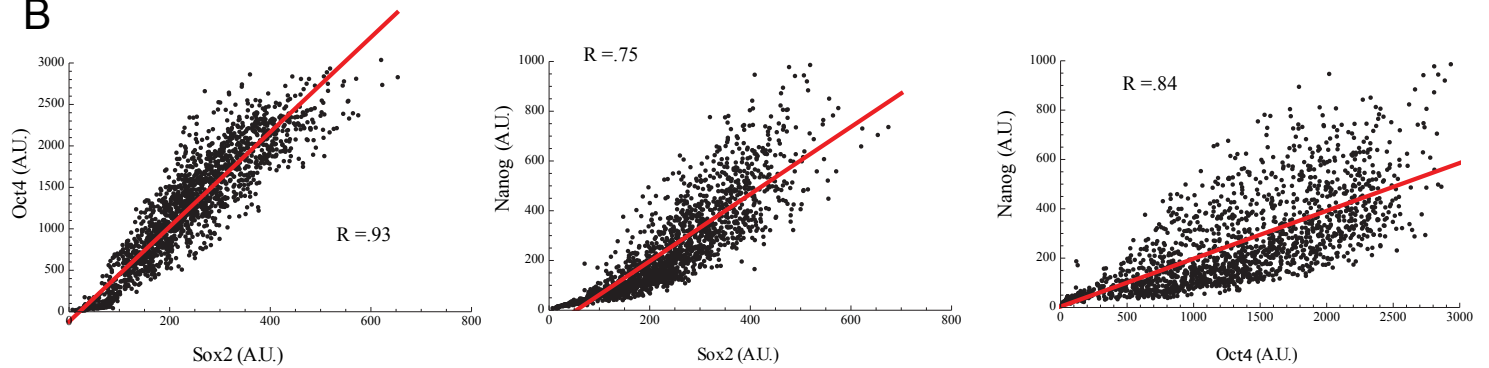

C

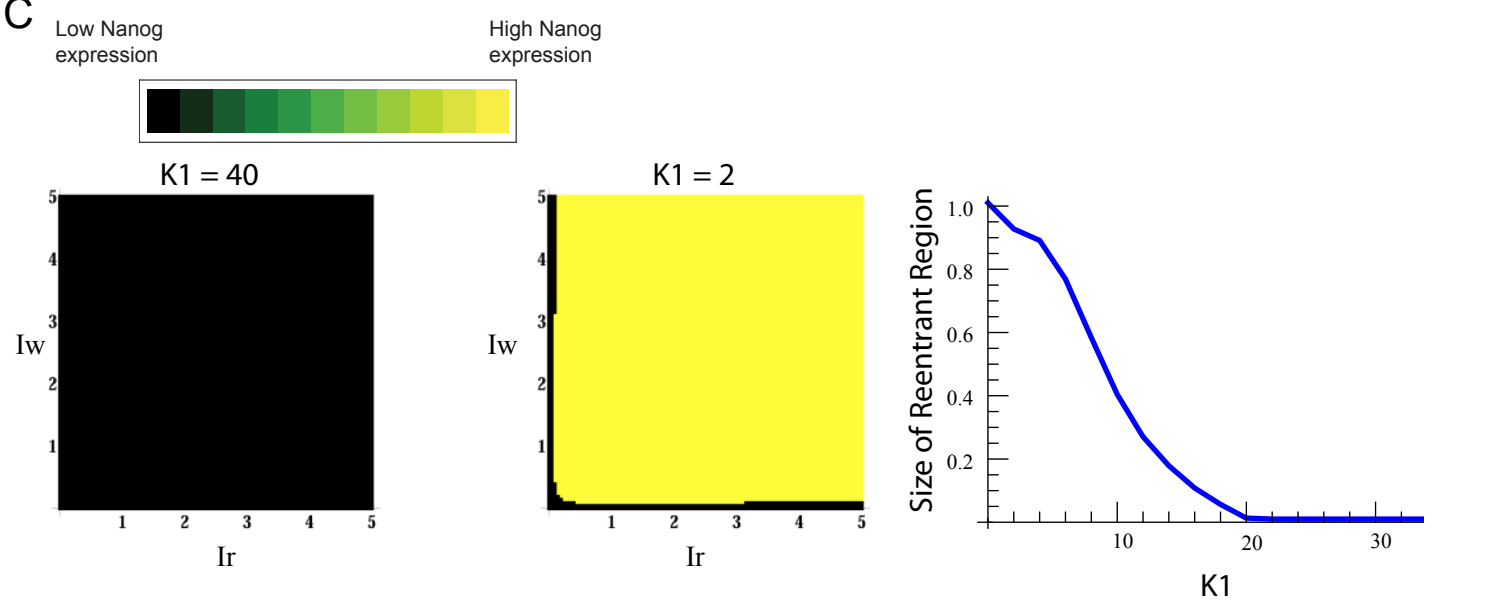

D

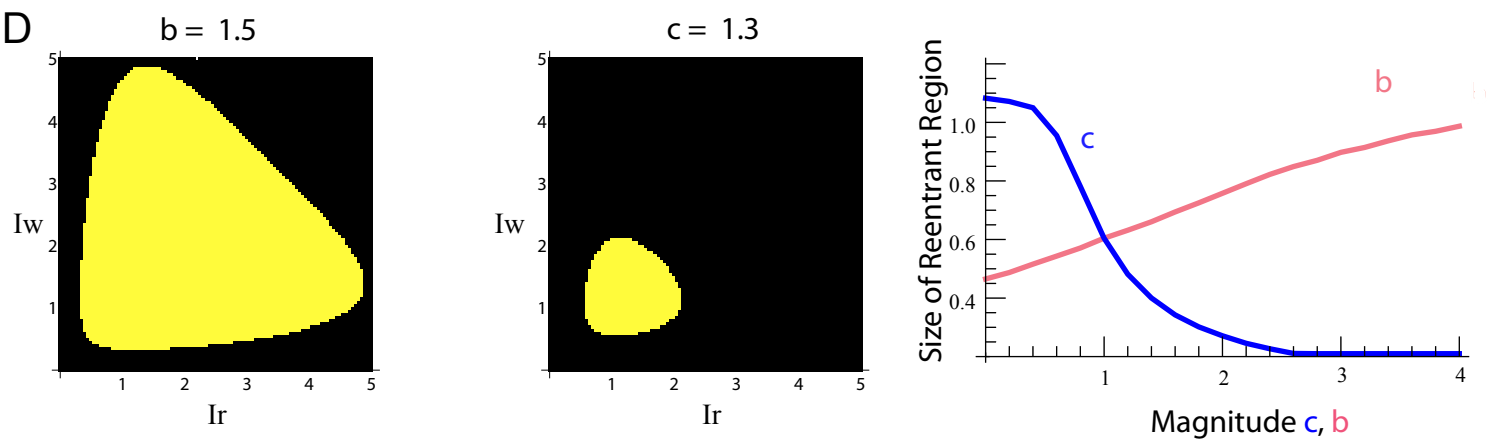

Supplement: NIHMS800882-supplement-6.pdf [file NIHMS800882-supplement-6.pdf]
